# Supplementary material for: pH-Responsive reversibly cross-linked micelles by phenol–yne click via curcumin as a drug delivery system in cancer chemotherapy
Source: Royal Society of Chemistry journal article supplement (doi:10.1039/c9tb00305c), 2019-01-01
Supplement: c9tb00305c1.pdf [file c9tb00305c1.pdf]

Supporting information for  
pH-responsive reversibly cross-linked micelles by phenol-ene click  
via curcumin as a drug delivery system

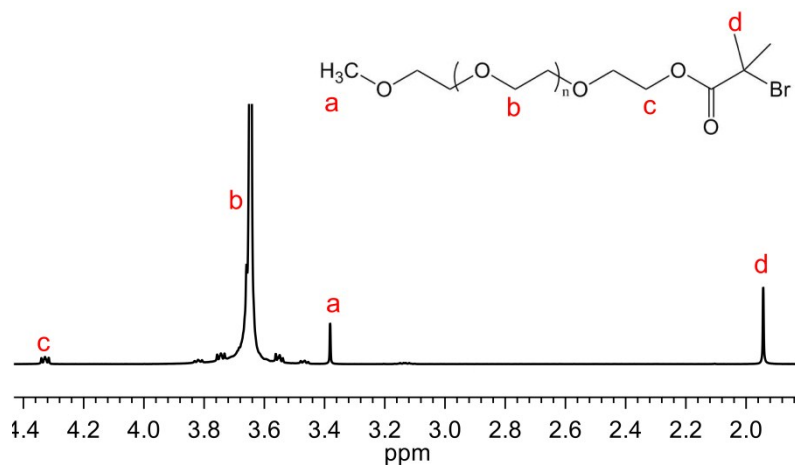

Figure S1.  $^1\text{H}$  NMR spectrum (400 MHz,  $\text{CDCl}_3$ ) of mPEG-Br

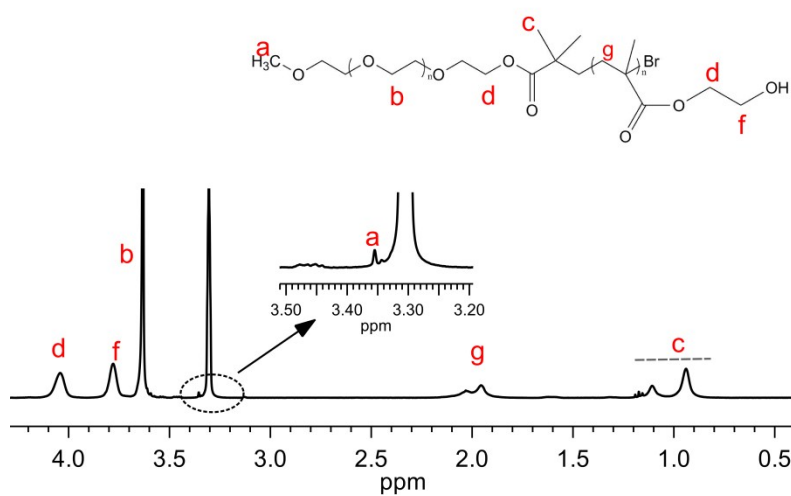

Figure S2.  $^1\text{H}$  NMR spectrum (400 MHz,  $\text{CDCl}_3:\text{CD}_3\text{OD} = 1:1$ ) of mPEG-b-PHEMA

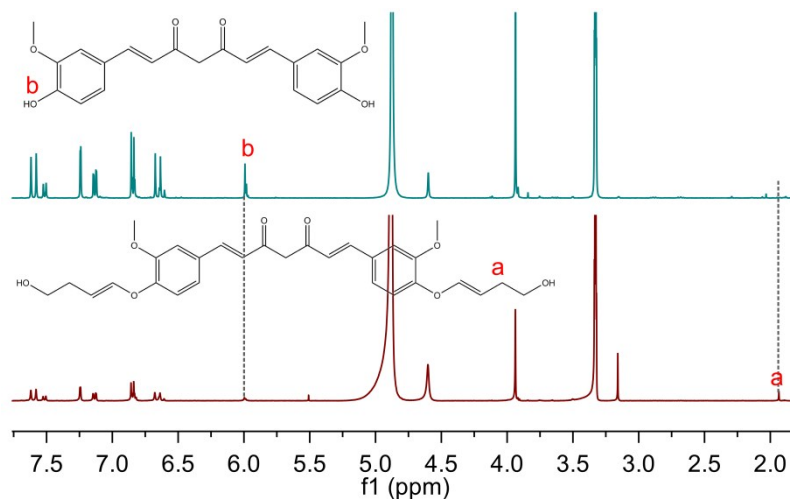

Figure S3.  $^1\text{H}$  NMR spectra (400 MHz,  $\text{CDCl}_3$ ) of curcumin (up) and curcumin-3-Bytyn-1-ol conjugates via phenol-yne click (down)

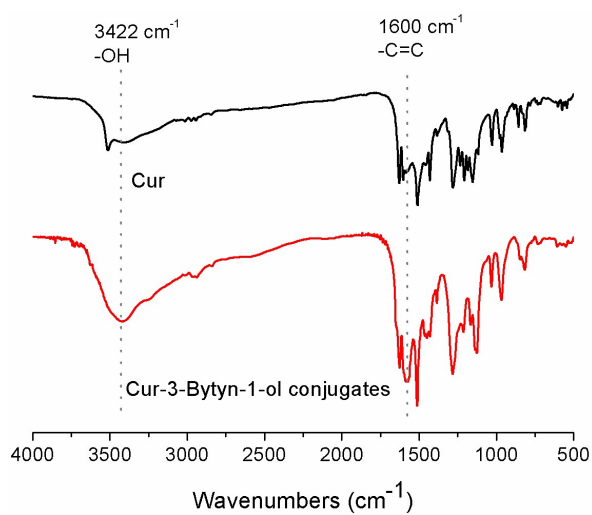

Figure S4. The infrared spectra of curcumin (up) and curcumin-3-Bytyn-1-ol conjugate via phenol-yne click (down)

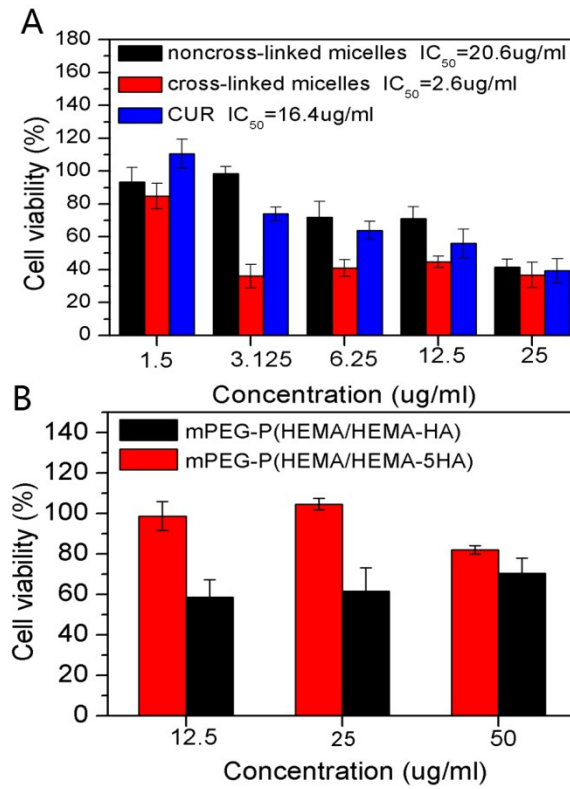

**Figure S5.** The viability of A549 cells measured by MTT assays after 48 h incubation with Cur and Cur-loaded micelles (A), and the blank micelles (B).

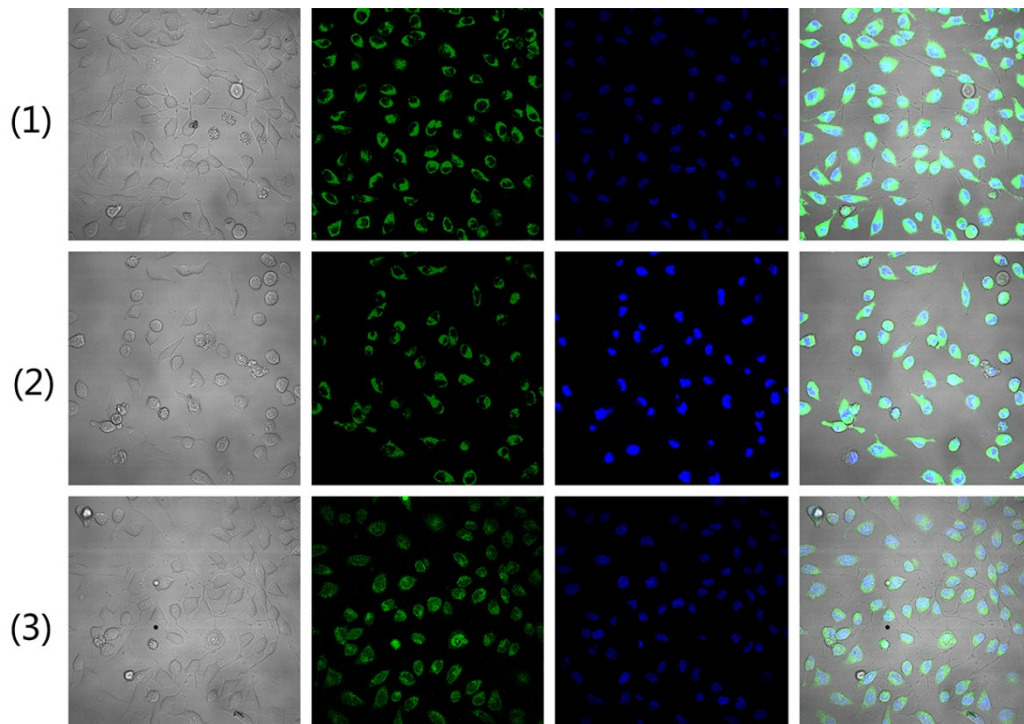

**Figure S6.** CLSM images of HeLa cells incubated for 48 h with Cur-loaded cross-linked (1), noncross-linked micelles (2) and free Cur (3) (10 ug/mL)

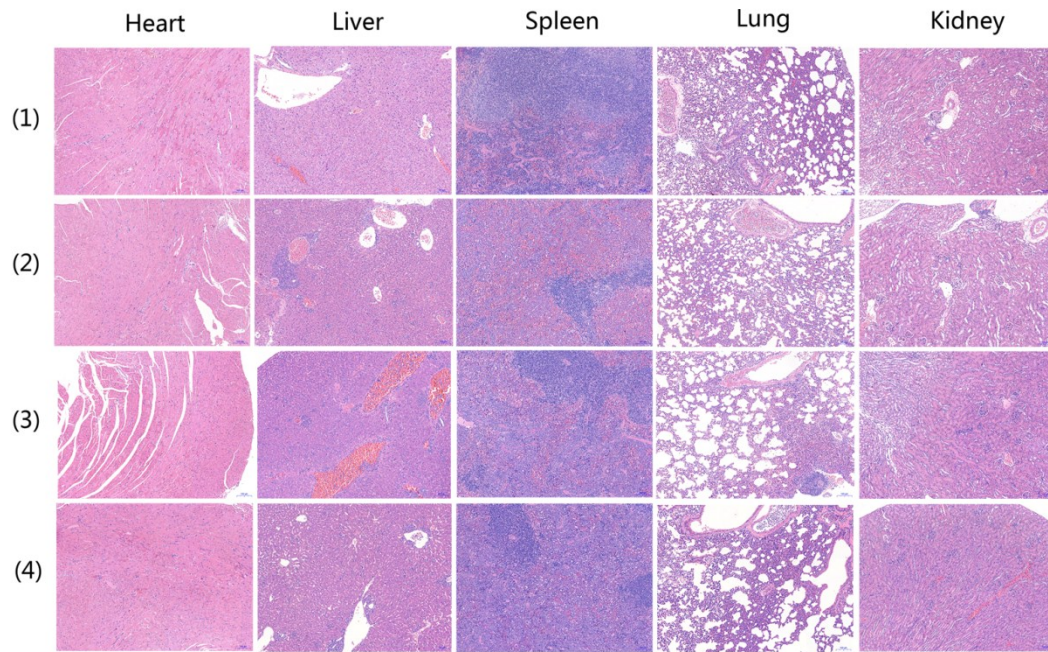

**Figure S7.** The histological analyses of H&E stained sections of major organs. PBS (1), free Cur (2), cross-linked micelles (3), noncross-linked micelles (4).
